# Supplementary material for: Sustained remission following the discontinuation of tofacitinib in patients with rheumatoid arthritis (XANADU study): an open-label randomised study
Source: PubMed Central journal article supplement (PMC10152036; doi:10.1136/rmdopen-2023-003029), 2023-04-25
Supplement: rmdopen-2023-003029supp001.pdf [file rmdopen-2023-003029supp001.pdf]

## S Kubo et al. Xanadu study supplemental tables 1

Supplemental Table S1. Baseline clinical characteristics at discontinuation

| Variables                | Discontinuation of tofacitinib<br>(n=24) | Discontinuation of methotrexate<br>(n=20) | p value |
|--------------------------|------------------------------------------|-------------------------------------------|---------|
| Disease duration (month) | 103.5 (79.8)                             | 115.3 (103.8)                             | 0.9061  |
| Prior use of biologics   | 17 (70.8%)                               | 12 (60.0%)                                | 0.5316  |
| 28-tender joint count    | 0.4 (1.0)                                | 0.2 (0.4)                                 | 0.6733  |
| 28-swollen joint count   | 0.2 (0.5)                                | 0.0 (0.2)                                 | 0.4341  |
| PGA, VAS 0-100 mm        | 10.0 (7.7)                               | 11.0 (14.8)                               | 0.4349  |
| EGA, VAS 0-100 mm        | 3.9 (5.7)                                | 3.5 (6.9)                                 | 0.5693  |
| DAS28-ESR                | 2.2 (0.5)                                | 2.2 (0.5)                                 | 0.9812  |
| CDAI                     | 1.5 (0.7)                                | 1.2 (1.2)                                 | 0.1002  |
| HAQ-DI                   | 0.6 (0.7)                                | 0.3 (0.4)                                 | 0.2866  |
| CRP (mg/dl)              | 0.1 (0.1)                                | 0.1 (0.1)                                 | 0.7135  |
| ESR (mm/hr)              | 16.6 (11.4)                              | 24.3 (18.3)                               | 0.1249  |
| Rheumatoid factor (U/ml) | 56.0 (84.5)                              | 95.6 (121.6)                              | 0.0375  |
| Positive (%)             | 19 (79.2%)                               | 9 (45.0%)                                 | 0.0190  |
| Anti-CCP antibody (U/ml) | 185.0 (399.9)                            | 149.0 (433.7)                             | 0.9686  |
| Positive (%)             | 18 (75.0%)                               | 12 (60.0%)                                | 0.2875  |
| MMP-3 (ng/ml)            | 46.0 (16.0)                              | 53.7 (29.9)                               | 0.6311  |

Data reported as mean (SD). PGA, patient's global assessment; EGA, evaluator's global assessment; DAS28, disease activity score 28 joint; ESR, erythrocyte sedimentation rate; CDAI, clinical disease activity index; HAQ, health assessment questionnaire; CRP, C reactive protein; CCP, cyclic citrullinated peptide.

## S Kubo et al. Xanadu study supplemental tables 2

Supplemental Table S2. The reason of withdrawal from Xanadu study

|                             | Discontinuation of tofacitinib<br>(n=56) | Discontinuation of methotrexate<br>(n=57)                                                                  | p value |
|-----------------------------|------------------------------------------|------------------------------------------------------------------------------------------------------------|---------|
| Until week 52               |                                          |                                                                                                            |         |
| Serious adverse events      | 2 (3.6%)                                 | 6 (10.5%)                                                                                                  | 0.1495  |
|                             | Shingles<br>Appetite loss                | Malignancy (lymphoma,<br>Pancreatic cancer)<br>Oral aphtha<br>General fatigue<br>Appetite loss<br>Eruption |         |
| Lack of efficacy            | 3 (5.4%)                                 | 5 (8.8%)                                                                                                   | 0.4769  |
| Economic burden             | 2 (3.6%)                                 | 0 (0.0%)                                                                                                   | 0.1500  |
| Between week 52 to week 104 |                                          |                                                                                                            |         |
| Serious adverse events      | 0 (0.0%)                                 | 0 (0.0%)                                                                                                   | -       |
| Disease flare               | 14 (25.0%)                               | 7 (12.3%)                                                                                                  | 0.1228  |

## S Kubo et al. Xanadu study supplemental tables 3

Supplemental Table 3 Key factors at baseline to achieve clinical remission and the following sustained LDA after the discontinuation of tofacitinib or methotrexate.

| Variables                                    | Discontinuation of tofacitinib (n=56) |                                   |               | Discontinuation of methotrexate (n=57) |                                   |               |
|----------------------------------------------|---------------------------------------|-----------------------------------|---------------|----------------------------------------|-----------------------------------|---------------|
|                                              | Sustained LDA<br>n=10                 | Others<br>n=46                    | p value       | Sustained LDA<br>n=13                  | Others<br>n=44                    | p value       |
| Age (years)                                  | 59.3 (12.4)                           | 60.3 (11.7)                       | 0.8472        | 57.5 (12.0)                            | 56.4 (14.8)                       | 0.8715        |
| Gender, n (% female)                         | 8 (80.0%)                             | 40 (87.0%)                        | 0.5688        | 12 (92.3%)                             | 35 (79.6%)                        | 0.2878        |
| Disease duration (month)                     | 52.9 (70.7)                           | 106.2 (103.1)                     | 0.0671        | 83.6 (85.4)                            | 119 (107.6)                       | 0.2092        |
| Steinbrocker's classification, % I/II/III/IV | 20/60/10/10                           | 17/50/13/20                       | 0.8798        | 23/54/8/15                             | 25/36/18/21                       | 0.6575        |
| Prior use of biologics                       | <b>6 (60.0%)</b>                      | <b>36 (78.3%)</b>                 | <b>0.0152</b> | 8 (61.5%)                              | 28 (63.6%)                        | 0.8904        |
| MTX use at baseline, n (%)                   | 10 (100.0%)                           | 46 (100.0%)                       | 1             | 13 (100.0%)                            | 44 (100.0%)                       | 1             |
| dose, mg/w                                   | 12.4 (3.0)                            | 11.2 (4.2)                        | 0.4404        | 12.0 (3.7)                             | 12.5 (3.5)                        | 0.7545        |
| Glucocorticoid use at baseline, n (%)        | 0 (0.0%)                              | 6 (13.0%)                         | 0.2268        | 1 (7.7%)                               | 3 (6.8%)                          | 0.9137        |
| dose, mg/day                                 | -                                     | 5.0 (3.6-5.0)                     | -             | 2.5                                    | 5.0 (5.0-7.5)                     | -             |
| Tofacitinib dose, n (%)                      | 5mg; 0 (0.0%)<br>10mg; 10 (100.0%)    | 5mg; 2 (4.4%)<br>10mg; 44 (95.7%) | 0.5019        | 5mg; 3 (23.1%)<br>10mg; 10 (76.9%)     | 5mg; 3 (6.8%)<br>10mg; 41 (93.2%) | 0.0933        |
| 28-tender joint count                        | 7.1 (6.2)                             | 8.7 (6.0)                         | 0.4212        | 7.6 (6.2)                              | 9.1 (5.8)                         | 0.375         |
| 28-swollen joint count                       | 8.4 (3.8)                             | 8.2 (4.9)                         | 0.7394        | 6.7 (4.3)                              | 6.7 (4.3)                         | 0.6398        |
| PGA, VAS 0-100 mm                            | 61.4 (23.3)                           | 54.4 (25.7)                       | 0.4223        | 46.8 (17.6)                            | 49.3 (24.0)                       | 0.7826        |
| EGA, VAS 0-100 mm                            | 51.3 (18.4)                           | 45.2 (22.5)                       | 0.2655        | 42 (17.1)                              | 44.6 (22.4)                       | 0.8194        |
| DAS28-ESR                                    | 5.5 (1.2)                             | 5.5 (1.3)                         | 0.8473        | 5.4 (1.2)                              | 5.2 (1.2)                         | 0.6419        |
| CDAI                                         | 27.7 (11.1)                           | 27.4 (12.6)                       | 0.881         | 24.6 (11.9)                            | 25.8 (11.1)                       | 0.6209        |
| HAQ-DI                                       | 1.0 (0.8)                             | 1.3 (0.8)                         | 0.2428        | 1.3 (0.7)                              | 1.1 (0.8)                         | 0.4867        |
| CRP (mg/dl)                                  | 2.9 (3.2)                             | 1.9 (3.3)                         | 0.2523        | 2.4 (4.2)                              | 1.7 (2.7)                         | 0.2867        |
| ESR (mm/hr)                                  | 52.7 (39.9)                           | 43.9 (31.1)                       | 0.6151        | 47.8 (28.0)                            | 36.5 (31.0)                       | 0.1232        |
| Rheumatoid factor (U/ml)                     | 93.2 (102.5)                          | 152.5 (179.2)                     | 0.3095        | 75.2 (101.0)                           | 202.0 (397.6)                     | 0.6618        |
| Positive (%)                                 | 8 (80.0%)                             | 42 (91.3%)                        | 0.2949        | 8 (61.5%)                              | 28 (63.6%)                        | 0.8904        |
| Anti-CCP antibody (U/ml)                     | <b>94.6 (162.4)</b>                   | <b>206.7 (310.8)</b>              | <b>0.0569</b> | 226.1 (440.3)                          | 165.3 (406.3)                     | 0.1707        |
| Positive (%)                                 | <b>6 (60.0%)</b>                      | <b>43 (93.5%)</b>                 | <b>0.0037</b> | 10 (76.9%)                             | 29 (65.9%)                        | 0.4529        |
| MMP-3 (ng/ml)                                | 412.4 (609.3)                         | 230.8 (312.5)                     | 0.2901        | 344.1 (405.6)                          | 155.1 (201.4)                     | <b>0.0251</b> |

Data reported as mean (SD). MTX, methotrexate; PGA, patient's global assessment; EGA, evaluator's global assessment; DAS28, disease activity score 28 joint; ESR, erythrocyte sedimentation rate; CDAI, clinical disease activity index; HAQ, health assessment questionnaire; CRP, C reactive protein; CCP, cyclic citrullinated peptide; MMP-3, matrix metalloproteinase-3.
