# Supplementary material for: Sustained remission following the discontinuation of tofacitinib in patients with rheumatoid arthritis (XANADU study): an open-label randomised study
Source: HighWire-hosted journal article supplement (doi:10.1136/rmdopen-2023-003029), 2023-04-01

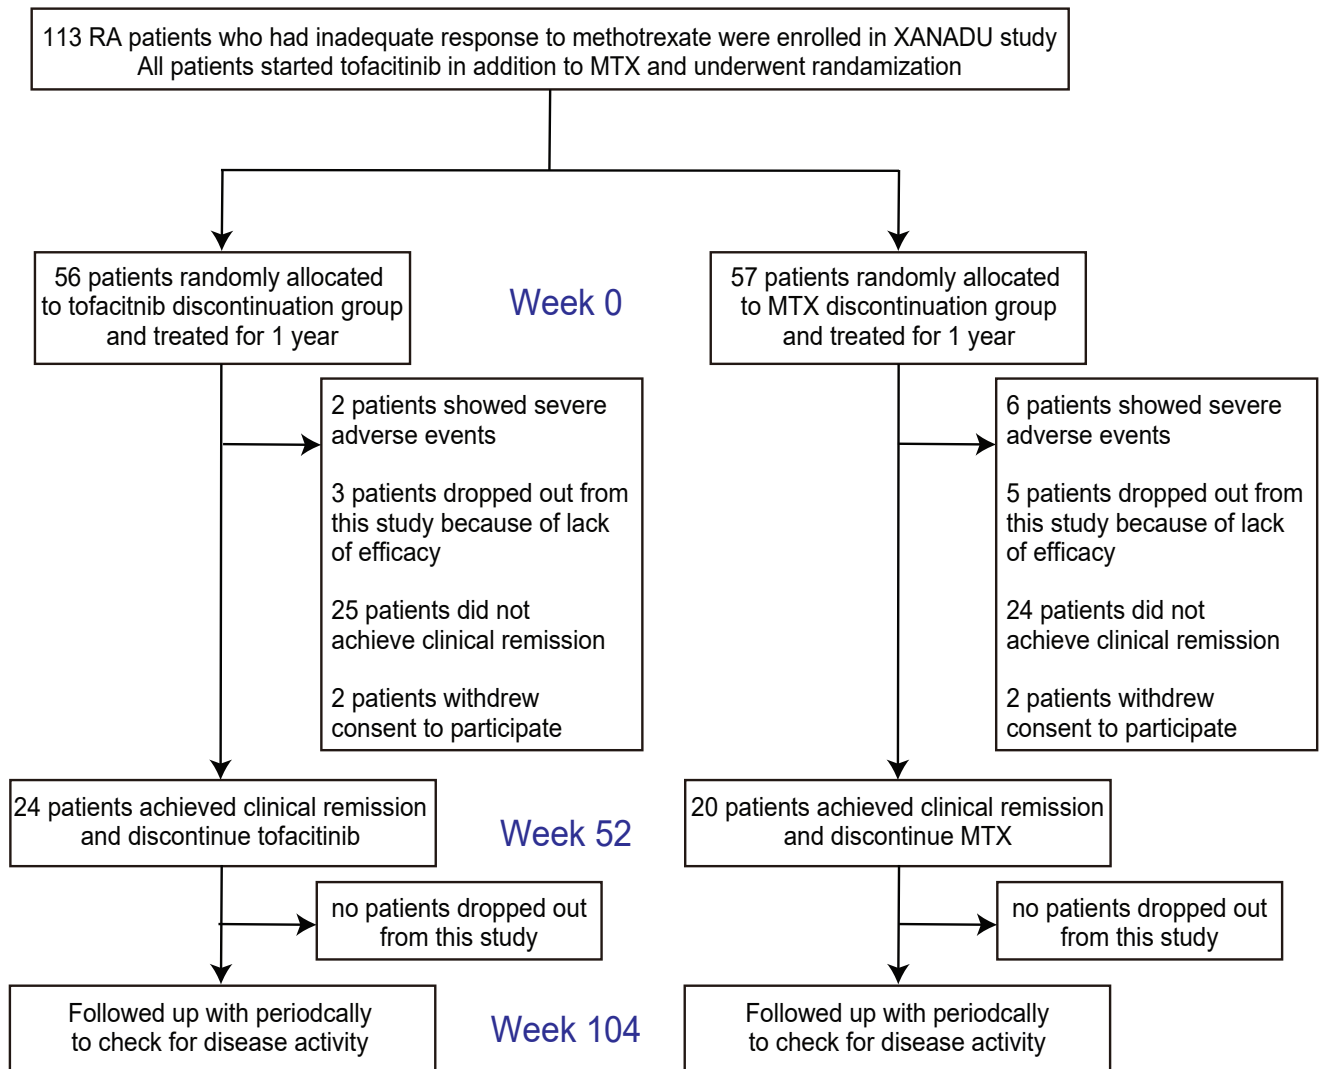

Supplement: rmdopen-2023-003029supp002_data_supplement.pdf [file rmdopen-2023-003029supp002_data_supplement.pdf]
